# Supplementary material
Source: PubMed Central journal article supplement (PMC4201382)
Supplement: NIHMS620023-supplement-02.pdf [file NIHMS620023-supplement-02.pdf]

**Supplementary Information**Park, *et al.*

JMJD3 activates adult brain neurogenesis

**Supplemental Tables****Table S1. qChIP Primers and Antibodies, Related to Figure 3 and 5.**

| Primer name        | Sequence              | Amplicon size (bp) |
|--------------------|-----------------------|--------------------|
| Dlx2 Upstream F    | TTGGCTAAGGAAGGCCTAGA  | 61 bp              |
| Dlx2 Upstream R    | CACCAGGGAGCGTTTCTAAT  | 61 bp              |
| Dlx2 Promoter F    | AAGCACTGCAGAAAGTGGGTA | 76 bp              |
| Dlx2 Promoter R    | GGAGCCTTATGTCCTGTTGC  | 76 bp              |
| I12b Enhancer F    | AGGCCCGGCCATTGACAAGC  | 87 bp              |
| I12b Enhancer R    | GCGAGCTGCCATCTCTGCAA  | 87 bp              |
| Slc32a1 Promoter F | CAGCTCGGCAATGAAACTCG  | 106 bp             |
| Slc32a1 Promoter R | AGATACAGCTGTGGGTTGGC  | 106 bp             |
| Myt1 Promoter F    | TGGTTTGGAGCACCTCTCAC  | 122 bp             |
| Myt1 Promoter R    | ACGCTACCCATGAACCCTTG  | 122 bp             |
| Gjb6 Promoter F    | AGAAGCCACAGGTGGAAACC  | 97 bp              |
| Gjb6 Promoter R    | TACCCTGAGCGTAGGTTGGA  | 97 bp              |
| URE2 F             | GCATCCAGGCCTTTTACTGC  | 90 bp              |
| URE2 R             | TAGTAGGCGGGAGCTCCATT  | 90 bp              |

| Antibody | Company            | Cat#      | µg/ml    |
|----------|--------------------|-----------|----------|
| H3K4me3  | Active Motif       | 39159     | 1µg/ml   |
| H3K27me3 | Active Motif       | 39155     | 1µg/ml   |
| H3K4me1  | Active Motif       | 39635     | 2µg/ml   |
| H3K27ac  | Active Motif       | 39133     | 2µg/ml   |
| p300     | Santa Cruz Biotech | sc-585    | 2µg/ml   |
| JMJD3    | ABGENT             | AP1022a   | 4µg/ml   |
| MLL1     | Bethyl             | A300-374A | 2µg/ml   |
| IgG      | Santa Cruz Biotech | sc-2027   | 2-4µg/ml |

**Supplementary Information**Park, *et al.*

JMJD3 activates adult brain neurogenesis

**Table S2. Selected Gene Ontology categories for 1050 genes upregulated after 30 h of differentiation in control NSCs (Figure 3C, P<0.05).**

| <b>Category</b> | <b>Term and Description</b>                                       | <b>Count</b> | <b>%</b> | <b>P Value</b> |
|-----------------|-------------------------------------------------------------------|--------------|----------|----------------|
| GOTERM_BP_FAT   | GO:0021543~pallium development                                    | 9            | 0.953390 | 0.002339       |
| GOTERM_BP_FAT   | GO:0021761~limbic system development                              | 7            | 0.741525 | 0.003136       |
| GOTERM_BP_FAT   | GO:0021766~hippocampus development                                | 6            | 0.635593 | 0.003745       |
| GOTERM_MF_FAT   | GO:0004407~histone deacetylase activity                           | 5            | 0.529661 | 0.004541       |
| GOTERM_BP_FAT   | GO:0021537~telencephalon development                              | 10           | 1.059322 | 0.004757       |
| GOTERM_BP_FAT   | GO:0014014~negative regulation of gliogenesis                     | 4            | 0.423729 | 0.006172       |
| GOTERM_BP_FAT   | GO:0045686~negative regulation of glial cell differentiation      | 4            | 0.423729 | 0.006172       |
| GOTERM_BP_FAT   | GO:0050767~regulation of neurogenesis                             | 14           | 1.483051 | 0.006377       |
| GOTERM_BP_FAT   | GO:0050768~negative regulation of neurogenesis                    | 7            | 0.741525 | 0.006468       |
| GOTERM_BP_FAT   | GO:0051960~regulation of nervous system development               | 14           | 1.483051 | 0.015834       |
| GOTERM_BP_FAT   | GO:0030900~forebrain development                                  | 15           | 1.588983 | 0.018268       |
| GOTERM_BP_FAT   | GO:0048715~negative regulation of oligodendrocyte differentiation | 3            | 0.317797 | 0.018381       |
| GOTERM_BP_FAT   | GO:0045685~regulation of glial cell differentiation               | 4            | 0.423729 | 0.022629       |
| GOTERM_BP_FAT   | GO:0014013~regulation of gliogenesis                              | 4            | 0.423729 | 0.022629       |
| GOTERM_BP_FAT   | GO:0048713~regulation of oligodendrocyte differentiation          | 3            | 0.317797 | 0.036360       |
| GOTERM_BP_FAT   | GO:0007413~axonal fasciculation                                   | 3            | 0.317797 | 0.036360       |
| GOTERM_BP_FAT   | GO:0001764~neuron migration                                       | 8            | 0.847458 | 0.037053       |

**Supplementary Information**Park, *et al.*

JMJD3 activates adult brain neurogenesis

**Table S3. Selected Gene Ontology categories for 53 genes in Figure 3C (P<0.05).**

| Category      | Term and Description                                                                                                | Count | %        | P Value  |
|---------------|---------------------------------------------------------------------------------------------------------------------|-------|----------|----------|
| GOTERM_MF_FAT | GO:0003677~DNA binding                                                                                              | 15    | 30.61224 | 5.76E-05 |
| GOTERM_BP_FAT | GO:0006323~DNA packaging                                                                                            | 5     | 10.20408 | 2.14E-04 |
| GOTERM_BP_FAT | GO:0006334~nucleosome assembly                                                                                      | 4     | 8.163265 | 0.001274 |
| GOTERM_BP_FAT | GO:0031497~chromatin assembly                                                                                       | 4     | 8.163265 | 0.001378 |
| GOTERM_BP_FAT | GO:0034728~nucleosome organization                                                                                  | 4     | 8.163265 | 0.001432 |
| GOTERM_BP_FAT | GO:0065004~protein-DNA complex assembly                                                                             | 4     | 8.163265 | 0.001432 |
| GOTERM_BP_FAT | GO:0021766~hippocampus development                                                                                  | 3     | 6.122449 | 0.002238 |
| GOTERM_BP_FAT | GO:0006333~chromatin assembly or disassembly                                                                        | 4     | 8.163265 | 0.003998 |
| GOTERM_BP_FAT | GO:0021761~limbic system development                                                                                | 3     | 6.122449 | 0.004211 |
| GOTERM_BP_FAT | GO:0021893~cerebral cortex GABAergic interneuron fate commitment                                                    | 2     | 4.081633 | 0.005879 |
| GOTERM_BP_FAT | GO:0021898~commitment of multipotent stem cells to the neuronal lineage in the forebrain                            | 2     | 4.081633 | 0.005879 |
| GOTERM_BP_FAT | GO:0021882~regulation of transcription from RNA polymerase II promoter involved in forebrain neuron fate commitment | 2     | 4.081633 | 0.005879 |
| GOTERM_BP_FAT | GO:0051276~chromosome organization                                                                                  | 6     | 12.2449  | 0.006334 |
| GOTERM_BP_FAT | GO:0021543~pallium development                                                                                      | 3     | 6.122449 | 0.010591 |
| GOTERM_BP_FAT | GO:0006325~chromatin organization                                                                                   | 5     | 10.20408 | 0.013435 |
| GOTERM_BP_FAT | GO:0021877~forebrain neuron fate commitment                                                                         | 2     | 4.081633 | 0.014635 |
| GOTERM_BP_FAT | GO:0048715~negative regulation of oligodendrocyte differentiation                                                   | 2     | 4.081633 | 0.014635 |
| GOTERM_BP_FAT | GO:0021537~telencephalon development                                                                                | 3     | 6.122449 | 0.018968 |
| GOTERM_BP_FAT | GO:0021892~cerebral cortex GABAergic interneuron differentiation                                                    | 2     | 4.081633 | 0.020430 |
| GOTERM_BP_FAT | GO:0048713~regulation of oligodendrocyte differentiation                                                            | 2     | 4.081633 | 0.020430 |
| GOTERM_BP_FAT | GO:0006836~neurotransmitter transport                                                                               | 3     | 6.122449 | 0.023107 |
| GOTERM_BP_FAT | GO:0014014~negative regulation of gliogenesis                                                                       | 2     | 4.081633 | 0.026192 |
| GOTERM_BP_FAT | GO:0045686~negative regulation of glial cell differentiation                                                        | 2     | 4.081633 | 0.026192 |
| GOTERM_BP_FAT | GO:0021895~cerebral cortex neuron differentiation                                                                   | 2     | 4.081633 | 0.034773 |
| GOTERM_BP_FAT | GO:0014013~regulation of gliogenesis                                                                                | 2     | 4.081633 | 0.040452 |
| GOTERM_BP_FAT | GO:0021879~forebrain neuron differentiation                                                                         | 2     | 4.081633 | 0.040452 |
| GOTERM_BP_FAT | GO:0045685~regulation of glial cell differentiation                                                                 | 2     | 4.081633 | 0.040452 |
| GOTERM_BP_FAT | GO:0021872~generation of neurons in the forebrain                                                                   | 2     | 4.081633 | 0.046100 |

## Supplementary Information

Park, *et al.*

JMJD3 activates adult brain neurogenesis

## Supplemental Experimental Procedures

### *Jmjd3* conditional knockout mice

*Jmjd3*<sup>F/F</sup> mice were generated, maintained and genotyped as illustrated in **Figure S2A-S2C**. The genomic region of *Jmjd3* (10.5 kb) in BAC bMQ73n09 from Wellcome Trust Sanger institute was cloned into pBluescript SK. To generate a *Jmjd3* allele containing the catalytic *JmjC* domain flanked by LoxP sites, a *loxP* sequence and a *Frt-Pgk-Neo-Frt-loxP* cassette was inserted between exon 20 and 21 and between exon 13 and 14, respectively. The linearized targeting construct was electroporated into E14Tg2A embryonic stem (ES) cells and selected with G418 (0.18 mg/ml). Targeted clones were screened by Southern blot analysis using 5' and 3' probes, and three of the correctly targeted clones were injected into C57BL/6J blastocysts (**Figure S2B**). Chimeric males were bred to C57BL/6J females, and the *Pgk1-Neo* cassette was removed by mating to Flp expressing mice. Mice were genotyped by genomic PCR with the following primers: WT/KO forward, GCGAGAGACCTGAGGCATGA; WT reverse, CTCGCCTCCACCAGAGTCTT; KO reverse, AGGGGAAGAGCTTGACAC (**Figure S2C**).

### Antibodies used for immunostaining

Brain sections and fixed SVZ cultures were blocked with 10% normal goat serum, 0.3% Triton-X 100, 1% bovine serum albumin, and 0.3M glycine in PBS for 1hr at 25 °C before primary antibody incubation at 4 °C overnight. For JMJD3 staining, heat-induced epitope retrieval was used with 10mM sodium citrate buffer (pH 6.0) and fluorescence signal was amplified using TSA Plus fluorescence kit (PerkinElmer). EdU was detected with the Alexa Fluor azide per manufacturer's protocol (Invitrogen). The following primary antibodies were used: rabbit anti-JMJD3 (epitope purified, 1:100), mouse anti-GFAP (1:1000, Sigma), guinea pig anti-Doublecortin (1:1000, Millipore), rat anti-BrdU (1:500, ThermoScientific), guinea pig anti-DLX2 (1:1,000, gift from Dr. Kazuaki Yoshikawa), mouse anti-NeuN (1:500, Chemicon), mouse anti-Nestin (1:500, Millipore), chicken anti-Vimentin (1:500, Millipore), mouse anti-S100 $\beta$  (1:100, Sigma), mouse anti- $\beta$ III-tubulin (Tuj1 clone, 1:1000, Covance), rabbit anti-Brain lipid binding protein (BLBP, 1:300, Millipore), rabbit anti- $\beta$  Catenin (1:500), mouse anti- $\gamma$ -Tubulin (1:1000, Abcam), rabbit anti-DsRed (1:500, Clontech), rabbit anti-Ki67 (1:500, Abcam), mouse anti-O4 (1:100, Millipore), rabbit anti-Olig2 (1:500, Millipore), and chicken anti-GFP (1:500, Aves). Goat Alexa-Fluor secondary antibodies (Invitrogen) were used, and nuclei were counterstained with DAPI (Sigma).

## Supplementary Information

Park, *et al.*

JMJD3 activates adult brain neurogenesis

### FACS isolation of SVZ cells for ChIP

SVZ NSC monolayer cultures were grown in 10cm dishes, and differentiation was induced for 0 or 3 d. Cells were then dissociated to a single cell suspension with 0.25% Trypsin and mechanical dissociation. To fix chromatin, the cell suspension was treated with 1% paraformaldehyde for 10 min at room temperature. Paraformaldehyde was then quenched with 0.125M glycine on ice for 5 minutes. After rinsing cells with PBS three times, 0 d cells were incubated with Alexa Fluor 488-conjugated GFAP and Alexa Fluor 647-conjugated Nestin antibodies (BD Pharmingen, 1:40) in blocking buffer for 30 min on ice. 3 d cells were treated identically except incubated with Alex Fluor 488-conjugated Tuj1 antibody (BD Pharmingen 1:40). Using a FACS Aria (BD Pharmingen) cell sorter with a 100  $\mu$ m nozzle and relatively low pressure, we first set FSC and SSC gates to eliminate debris and potential cell doublets. Unstained SVZ cells, Alexa Fluor 488 or Alexa Fluor 647 stained cells were individually used to set the sort gates. The fixed, FACS-isolated cells were then pelleted by centrifugation at 4°C and washed three times with ice-cold PBS containing protease inhibitor cocktail (Roche). For chromatin isolation, cells were incubated in 1 ml swelling buffer (0.1 M Tris pH7.6, 10 mM KOAc, 15 mM MgOAc) on ice for 20 min followed by dounce homogenization (20 times on ice). The nuclear pellet was isolated by centrifugating at 2500g for 5 min at 4°C. The pellet was lysed with 320 $\mu$ l lysis buffer (50 mM Tris, pH8, 10 mM EDTA, pH8, 1% SDS, Protease inhibitor cocktail) and incubated on ice for 10 min. Lysed nuclei were sonicated for 20-25 cycles at 30 sec on and 30 sec to achieve 200-700 bp band of sheared chromatin. ChIP qPCR was subsequently performed as previously described in this methods section. qPCR analysis was performed in a Light Cycler 480 machine (Roche), using technical triplicates and ChIP-qPCR signals were calculated as percentage of input. Standard deviations were measured from the technical triplicate reactions and represented as error bars with error propagated using the root sum square of the standard deviation of input and sample. Statistical tests of significance were analyzed using t-Test in GraphPad Prism 5.

### Microarray analysis

Samples from 3 biological replicates (P9 UBC-Cre/ERT2;*Jmjd3*<sup>F/F</sup> and littermate control) were prepared as described in Ramos et al., 2013 and hybridized to MouseRef-8 v2.0 Expression BeadChip arrays (Illumina). Array data were normalized using IlluminaNormalizer v.2 (Normalizing method; Quantile) on the Gene Pattern public server (Reich et al., 2006) and

## Supplementary Information

Park, *et al.*

JMJD3 activates adult brain neurogenesis

then processed using Cyber-T web server (<http://cybert.ics.uci.edu/>) which is based on the Bayesian regularization method for high-throughput differential analysis (Bayesian analysis parameters; Siding window size-101, Bayesian Confidence value-9) (Kayala and Baldi, 2012). Genes with false discovery rate (FDR)-corrected P values (Q values) less than 0.05 and fold changes more than 1.5 were considered to be significant. As a result, 1050 upregulated genes in control cells after 30 h of differentiation and 53 genes in which expression was significantly decreased in *Jmjd3*-deleted cells in 30 h differentiation condition were identified. 18 genes overlapped between two groups were considered as potential JMJD3 targets. For Gene Ontology (GO) annotations, gene groups from microarray analysis were analyzed using DAVID functional annotation tool (<http://david.abcc.ncifcrf.gov/>) with the default parameter and GO categories significantly enriched in each gene group ( $P < 0.05$ ) were selected. GO categories related to chromatin biology and neurodevelopmental process were listed in Supplementary Table 2 and 3. These GO categories were highly enriched in the 53 gene group (48%, 27/56).

## Bioinformatic analysis

SVZ RNA-seq and SVZ NSC ChIP-seq data was analyzed as in (Ramos et al., 2013). ChIP-seq data from GEO series GSE36673, GSE42881, and GSE13845 were analyzed as follows: FASTQ reads were aligned to mm9 using Bowtie2 2.1.0 with default parameters (Langmead et al., 2009). Tracks and peaks were generated using MACS 1.4 with default parameters (Zhang et al., 2008). Co-occupancy analysis was performed using BEDTools against published peaks (Quinlan and Hall, 2010). Genomic Regions Enrichment of Annotations Tool (GREAT) analysis was performed with the following parameters: 5kb upstream and 1kb downstream for proximal sites; 1 Mb extension for distal sites;  $FDR < 0.05$  (McLean et al., 2010). Plots were generated using ngsplot (Shen et al., 2013).

## Supplemental References

Kayala, M.A., and Baldi, P. (2012). Cyber-T web server: differential analysis of high-throughput data. *Nucleic Acids Res* 40, W553-559.

Langmead, B., Trapnell, C., Pop, M., and Salzberg, S.L. (2009). Ultrafast and memory-efficient alignment of short DNA sequences to the human genome. *Genome Biol* 10, R25.

## Supplementary Information

Park, *et al.*

JMJD3 activates adult brain neurogenesis

McLean, C.Y., Bristor, D., Hiller, M., Clarke, S.L., Schaar, B.T., Lowe, C.B., Wenger, A.M., and Bejerano, G. (2010). GREAT improves functional interpretation of cis-regulatory regions. *Nat Biotechnol* 28, 495-501.

Quinlan, A.R., and Hall, I.M. (2010). BEDTools: a flexible suite of utilities for comparing genomic features. *Bioinformatics* 26, 841-842.

Ramos, A.D., Diaz, A., Nellore, A., Delgado, R.N., Park, K.Y., Gonzales-Roybal, G., Oldham, M.C., Song, J.S., and Lim, D.A. (2013). Integration of Genome-wide Approaches Identifies lncRNAs of Adult Neural Stem Cells and Their Progeny In Vivo. *Cell Stem Cell* 12, 616-628.

Reich, M., Liefeld, T., Gould, J., Lerner, J., Tamayo, P., and Mesirov, J.P. (2006). GenePattern 2.0. *Nat Genet* 38, 500-501.

Shen, L., Shao, N., Liu, X., and Nestler, E. (2013). ngs.plot: An easy-to-use global visualization tool for next-generation sequencing data. Icahn School of Medicine at Mount Sinai, New York <http://code.google.com/p/ngsplot/>.

Zhang, Y., Liu, T., Meyer, C.A., Eeckhoute, J., Johnson, D.S., Bernstein, B.E., Nusbaum, C., Myers, R.M., Brown, M., Li, W., *et al.* (2008). Model-based analysis of ChIP-Seq (MACS). *Genome Biol* 9, R137.
